# Supplementary material for: The Age-Specific Quantitative Effects of Metabolic Risk Factors on Cardiovascular Diseases and Diabetes: A Pooled Analysis
Source: PubMed Central journal article supplement (PMC3728292; doi:10.1371/journal.pone.0065174), 2013-07-30
Supplement: pone.0065174.s001.pdf [file pone.0065174.s001.pdf]

**Table S1. Log relative risks in original age groups as reported in pooling projects**

| <b>Disease outcome</b>               | <b>Original source of RRs</b> | <b>Original age range or age at event</b> | <b>Log(RR) (95% CI)</b> |
|--------------------------------------|-------------------------------|-------------------------------------------|-------------------------|
| <b>Systolic blood pressure (SBP)</b> |                               |                                           |                         |
| Ischemic heart disease               | PSC                           | 40-49                                     | 0.36( 0.32-0.40)        |
| Ischemic heart disease               | PSC                           | 50-59                                     | 0.35( 0.33-0.36)        |
| Ischemic heart disease               | PSC                           | 60-69                                     | 0.31( 0.30-0.32)        |
| Ischemic heart disease               | PSC                           | 60-79                                     | 0.26( 0.25-0.27)        |
| Ischemic heart disease               | PSC                           | 80-89                                     | 0.20( 0.18-0.22)        |
| Ischemic heart disease               | APCSC                         | 50-59                                     | 0.51( 0.42-0.60)        |
| Ischemic heart disease               | APCSC                         | 60-69                                     | 0.33( 0.26-0.39)        |
| Ischemic heart disease               | APCSC                         | 70-79                                     | 0.27( 0.21-0.33)        |
| Ischemic stroke                      | PSC                           | 50-59                                     | 0.52( 0.45-0.62)        |
| Ischemic stroke                      | PSC                           | 60-69                                     | 0.40( 0.34-0.45)        |
| Ischemic stroke                      | PSC                           | 70-79                                     | 0.35( 0.30-0.40)        |
| Ischemic stroke                      | PSC                           | 80-89                                     | 0.13( 0.07-0.20)        |
| Ischemic stroke                      | APCSC                         | 50-59                                     | 0.56( 0.49-0.63)        |
| Ischemic stroke                      | APCSC                         | 60-69                                     | 0.43( 0.37-0.49)        |
| Ischemic stroke                      | APCSC                         | 70-79                                     | 0.33( 0.26-0.40)        |
| Ischemic stroke                      | APCSC                         | 80-89                                     | 0.24( 0.12-0.36)        |
| Haemorrhagic stroke                  | PSC                           | 50-59                                     | 0.48( 0.42-0.54)        |
| Haemorrhagic stroke                  | PSC                           | 60-69                                     | 0.42( 0.38-0.47)        |
| Haemorrhagic stroke                  | PSC                           | 70-79                                     | 0.34( 0.29-0.38)        |
| Haemorrhagic stroke                  | PSC                           | 80-89                                     | 0.34( 0.26-0.42)        |
| Haemorrhagic stroke                  | APCSC                         | 50-59                                     | 0.76( 0.69-0.82)        |
| Haemorrhagic stroke                  | APCSC                         | 60-69                                     | 0.51( 0.46-0.58)        |
| Haemorrhagic stroke                  | APCSC                         | 70-79                                     | 0.34( 0.26-0.42)        |
| Haemorrhagic stroke                  | APCSC                         | 80-89                                     | 0.13(-0.01-0.29)        |
| Hypertensive heart disease           | PSC                           | 68                                        | 0.76( 0.69-0.80)        |
| Hypertensive heart disease           | APCSC                         | 30-44                                     | 1.83( 0.99-2.66)        |
| Hypertensive heart disease           | APCSC                         | 45-60                                     | 0.92( 0.40-1.43)        |
| Hypertensive heart disease           | APCSC                         | 60-70                                     | 0.56( 0.34-0.78)        |
| Hypertensive heart disease           | APCSC                         | 70-80                                     | 0.43( 0.21-0.63)        |
| Hypertensive heart disease           | APCSC                         | 80-100                                    | 0.46( 0.21-0.69)        |
| Aortic aneurysm                      | PSC                           | 68                                        | 0.30( 0.24-0.36)        |
| Rheumatic heart disease              | PSC                           | 64                                        | 0.15( 0.06-0.25)        |
| Inflammatory heart disease           | PSC                           | 67                                        | 0.23( 0.14-0.32)        |
| Other cardiovascular disease         | PSC                           | 65                                        | 0.30( 0.17-0.41)        |
| Other cardiovascular disease         | APCSC                         | 71                                        | 0.25( 0.20-0.30)        |

| Disease outcome               | Original source of RRs | Original age range or age at event | Log(RR) (95% CI)  |
|-------------------------------|------------------------|------------------------------------|-------------------|
| <b>Total cholesterol (TC)</b> |                        |                                    |                   |
| Ischemic stroke               | PSC                    | 40-59                              | 0.31( 0.14-0.49)  |
| Ischemic stroke               | PSC                    | 60-69                              | 0.12(-0.01-0.24)  |
| Ischemic stroke               | PSC                    | 70-79                              | -0.06(-0.16-0.05) |
| Ischemic stroke               | PSC                    | 80-89                              | -0.09(-0.23-0.05) |
| Ischemic stroke               | APCSC                  | 25-34                              | 0.05(-0.37-0.46)  |
| Ischemic stroke               | APCSC                  | 35-44                              | 0.59( 0.51-0.66)  |
| Ischemic stroke               | APCSC                  | 45-54                              | 0.35( 0.30-0.40)  |
| Ischemic stroke               | APCSC                  | 55-64                              | 0.18( 0.13-0.23)  |
| Ischemic stroke               | APCSC                  | 65-74                              | 0.10( 0.03-0.16)  |
| Ischemic stroke               | APCSC                  | 75-84                              | 0.13( 0.02-0.24)  |
| Ischemic stroke               | APCSC                  | 85-99                              | 0.12(-0.20-0.45)  |
| Ischemic heart disease        | PSC                    | 40-49                              | 0.82( 0.73-0.87)  |
| Ischemic heart disease        | PSC                    | 50-59                              | 0.54( 0.49-0.58)  |
| Ischemic heart disease        | PSC                    | 60-69                              | 0.33( 0.30-0.37)  |
| Ischemic heart disease        | PSC                    | 70-79                              | 0.20( 0.16-0.22)  |
| Ischemic heart disease        | PSC                    | 80-89                              | 0.16( 0.12-0.20)  |
| Ischemic heart disease        | APCSC                  | 25-34                              | 0.61( 0.48-0.74)  |
| Ischemic heart disease        | APCSC                  | 35-44                              | 0.58( 0.53-0.63)  |
| Ischemic heart disease        | APCSC                  | 45-54                              | 0.53( 0.49-0.56)  |
| Ischemic heart disease        | APCSC                  | 55-64                              | 0.31( 0.28-0.34)  |
| Ischemic heart disease        | APCSC                  | 65-74                              | 0.22( 0.19-0.26)  |
| Ischemic heart disease        | APCSC                  | 75-84                              | 0.14( 0.07-0.21)  |
| Ischemic heart disease        | APCSC                  | 85-99                              | 0.36( 0.22-0.49)  |

| Disease outcome                     | Original source of RRs | Original age range or age at event | Log(RR) (95% CI)  |
|-------------------------------------|------------------------|------------------------------------|-------------------|
| <b>Fasting plasma glucose (FPG)</b> |                        |                                    |                   |
| Total stroke                        | APCSC                  | 30-60                              | 0.31( 0.01-0.60)  |
| Total stroke                        | APCSC                  | 60-69                              | 0.25( 0.15-0.35)  |
| Total stroke                        | APCSC                  | 70-99                              | 0.08(-0.04-0.19)  |
| Total stroke                        | DECODE                 | 25-44                              | -0.54(-1.31-0.22) |
| Total stroke                        | DECODE                 | 45-54                              | 0.17( 0.04-0.30)  |
| Total stroke                        | DECODE                 | 55-64                              | 0.18( 0.11-0.25)  |
| Total stroke                        | DECODE                 | 65-74                              | 0.17( 0.10-0.24)  |
| Total stroke                        | DECODE                 | 75-99                              | -0.04(-0.46-0.27) |
| Total stroke                        | ERFC                   | 63                                 | 0.12( 0.04-0.22)  |
| Total stroke                        | ERFC                   | 72.8                               | 0.13( 0.07-0.21)  |
| Total stroke                        | ERFC                   | 81.8                               | 0.07( 0.07-0.19)  |
| Ischemic heart disease              | APCSC                  | 30-60                              | 0.35( 0.23-0.48)  |
| Ischemic heart disease              | APCSC                  | 60-69                              | 0.18( 0.06-0.30)  |
| Ischemic heart disease              | APCSC                  | 70-99                              | 0.18( 0.07-0.29)  |
| Ischemic heart disease              | DECODE                 | 25-44                              | -0.09(-0.46-0.27) |
| Ischemic heart disease              | DECODE                 | 45-54                              | 0.18( 0.10-0.25)  |
| Ischemic heart disease              | DECODE                 | 55-64                              | 0.17( 0.13-0.19)  |
| Ischemic heart disease              | DECODE                 | 65-74                              | 0.13( 0.09-0.17)  |
| Ischemic heart disease              | DECODE                 | 75-99                              | 0.14( 0.06-0.23)  |
| Ischemic heart disease              | ERFC                   | 62.8                               | 0.12( 0.08-0.17)  |
| Ischemic heart disease              | ERFC                   | 72.5                               | 0.14( 0.08-0.21)  |
| Ischemic heart disease              | ERFC                   | 81.8                               | 0.10( 0.05-0.17)  |

| Disease outcome              | Original source of RRs | Original age range or age at event | Log(RR) (95% CI) |
|------------------------------|------------------------|------------------------------------|------------------|
| <b>Body mass index (BMI)</b> |                        |                                    |                  |
| Ischemic heart disease       | PSC                    | 35-59                              | 0.41( 0.33-0.48) |
| Ischemic heart disease       | PSC                    | 60-69                              | 0.34( 0.28-0.40) |
| Ischemic heart disease       | PSC                    | 70-79                              | 0.27( 0.21-0.34) |
| Ischemic heart disease       | PSC                    | 80-89                              | 0.26( 0.16-0.37) |
| Ischemic heart disease       | ERFC                   | 64.5                               | 0.34( 0.30-0.39) |
| Ischemic heart disease       | ERFC                   | 75.1                               | 0.26( 0.21-0.31) |
| Ischemic heart disease       | ERFC                   | 85.5                               | 0.20( 0.14-0.26) |
| Ischemic heart disease       | APCSC                  | 30-59                              | 0.59( 0.47-0.69) |
| Ischemic heart disease       | APCSC                  | 60-69                              | 0.26( 0.13-0.38) |
| Ischemic heart disease       | APCSC                  | 70-99                              | 0.15( 0.08-0.24) |
| Ischemic stroke              | PSC                    | 71.8                               | 0.32( 0.21-0.44) |
| Ischemic stroke              | APCSC                  | 30-59                              | 0.56( 0.41-0.69) |
| Ischemic stroke              | APCSC                  | 60-69                              | 0.29( 0.13-0.47) |
| Ischemic stroke              | APCSC                  | 70-99                              | 0.13( 0.01-0.26) |
| Ischemic stroke              | ERFC                   | 65.9                               | 0.34( 0.27-0.41) |
| Ischemic stroke              | ERFC                   | 76.6                               | 0.18( 0.10-0.26) |
| Ischemic stroke              | ERFC                   | 86.5                               | 0.13( 0.02-0.23) |
| Haemorrhagic stroke          | PSC                    | 66.2                               | 0.42( 0.28-0.58) |
| Haemorrhagic stroke          | ERFC                   | 66                                 | 0.36( 0.22-0.52) |
| Haemorrhagic stroke          | ERFC                   | 76.6                               | 0.22(-0.04-0.46) |
| Haemorrhagic stroke          | ERFC                   | 86.6                               | 0.11(-0.20-0.41) |
| Diabetes                     | PSC                    | 35-59                              | 1.53( 1.26-1.78) |
| Diabetes                     | PSC                    | 60-69                              | 1.08( 0.89-1.26) |
| Diabetes                     | PSC                    | 70-79                              | 0.77( 0.64-0.90) |
| Diabetes                     | PSC                    | 80-89                              | 0.26( 0.21-0.30) |
| Diabetes                     | APCSC                  | 30-59                              | 0.93( 0.72-1.16) |
| Diabetes                     | APCSC                  | 60-69                              | 0.72( 0.53-0.93) |
| Diabetes                     | APCSC                  | 70-99                              | 0.53( 0.29-0.75) |
